# Supplementary material for: Osteoblast precursors and inflammatory cells arrive simultaneously to sites of a trabecular-bone injury
Source: PubMed Central journal article supplement (PMC6066776; doi:10.1080/17453674.2018.1481682), 2018-06-05
Supplement: IORT_A_1481682_SM5753.pdf [file IORT_A_1481682_SM5753.pdf]

### Supplementary data

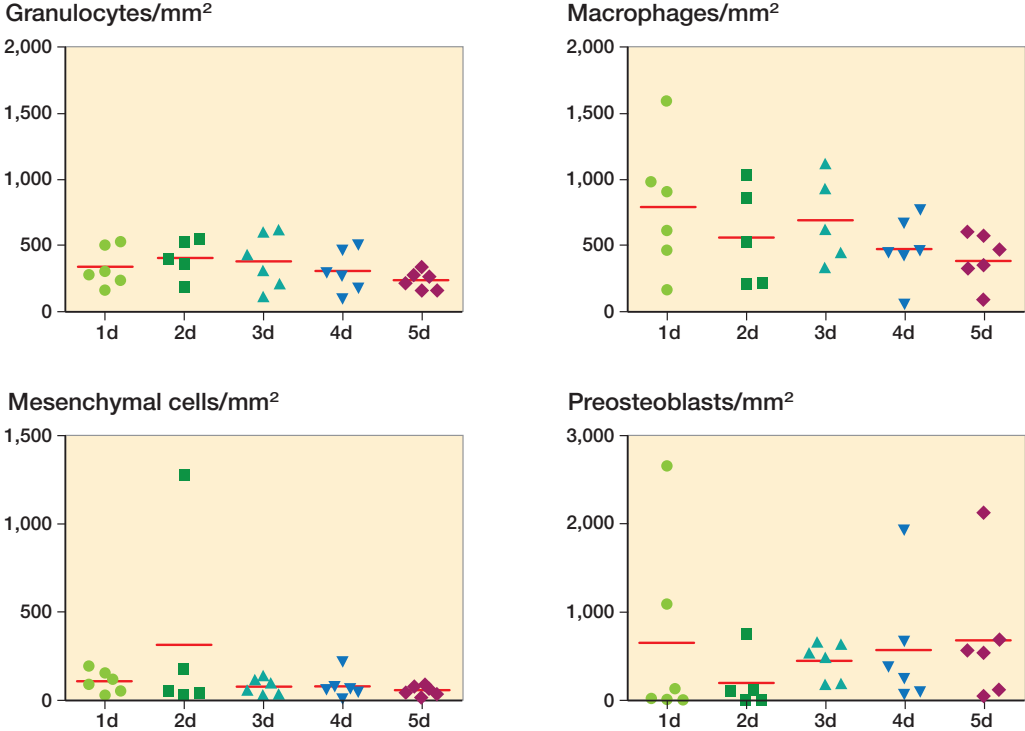

Figure 5. Quantification of cell populations in intact marrow in proximal tibia. No difference in cell numbers could be seen over the days for either of the markers.
